# Supplementary material for: Response patterns of moss to atmospheric nitrogen deposition and nitrogen saturation in an urban–agro–forest transition
Source: Copernicus journal article supplement (doi:10.5194/acp-24-5303-2024), 2024-05-07
Supplement: Supplementary file 1 [file acp-24-5303-2024-supplement.pdf]

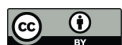

*Supplement of*

## **Response patterns of moss to atmospheric nitrogen deposition and nitrogen saturation in an urban–agro–forest transition**

**Ouping Deng et al.**

*Correspondence to:* Rong Huang (14624@sicau.edu.cn)

The copyright of individual parts of the supplement might differ from the article licence.

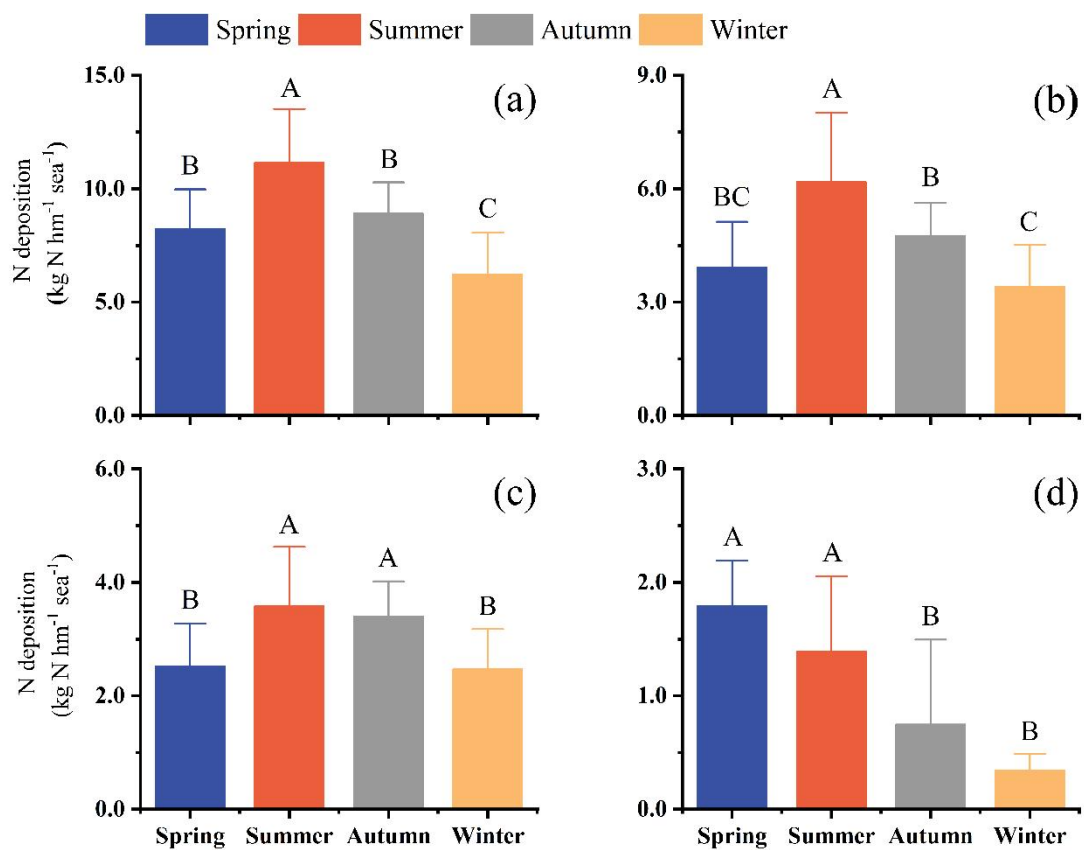

**Fig. S1.** Monthly nitrogen deposition flux of TN-N (a), NH<sub>4</sub><sup>+</sup>-N (b), NO<sub>3</sub><sup>-</sup>-N (c), and DON (d) deposition in four seasons. Different capital letters indicate that the differences among seasons are significant (one-way ANOVA,  $P < 0.05$ )

**Table S1.** Site descriptions.

| Site code | No.  | Latitude      | Longitude    | Elevation (m) | Annual precipitation (mm) | Temperature (°C) | Wind Speed (m s <sup>-1</sup> ) | Relative Humidity (%) | Land-use types     |
|-----------|------|---------------|--------------|---------------|---------------------------|------------------|---------------------------------|-----------------------|--------------------|
| QQ        | 1-1  | E 103.641264° | N 30.548144° | 516.4         | 1044.7                    | 16.73            | 1.19                            | 83.33                 | agricultural areas |
|           | 1-2  | E 103.653045° | N 30.561799° |               |                           |                  |                                 |                       |                    |
|           | 1-3  | E 103.642831° | N 30.561300° |               |                           |                  |                                 |                       |                    |
|           | 1-4* | E 103.643603° | N 30.569282° |               |                           |                  |                                 |                       |                    |
|           | 1-5  | E 103.641286° | N 30.571979° |               |                           |                  |                                 |                       |                    |
| CY        | 2-1* | E 130.670554° | N 30.611027° | 527.0         | 1041.2                    | 16.19            | 1.25                            | 85.94                 | urban areas        |
|           | 2-2  | E 103.669267° | N 30.609439° |               |                           |                  |                                 |                       |                    |
|           | 3-1  | E 103.632746° | N 30.725384° |               |                           |                  |                                 |                       |                    |
| YT        | 3-2  | E 103.634634° | N 30.728741° | 572.8         | 854.3                     | 16.09            | 0.72                            | 84.11                 | rural areas        |
|           | 3-3* | E 103.626781° | N 30.726417° |               |                           |                  |                                 |                       |                    |
|           | 3-4  | E 103.618498° | N 30.723724° |               |                           |                  |                                 |                       |                    |
| HY        | 3-5  | E 103.615494° | N 30.733426° | 658.4         | 1325.4                    | 16.09            | 0.40                            | 81.97                 | rural areas        |
|           | 4-1  | E 103.511853° | N 30.754818° |               |                           |                  |                                 |                       |                    |
|           | 4-2  | E 103.502626° | N 30.757437° |               |                           |                  |                                 |                       |                    |
|           | 4-3  | E 103.497434° | N 30.755556° |               |                           |                  |                                 |                       |                    |
|           | 4-4  | E 103.490267° | N 30.748770° |               |                           |                  |                                 |                       |                    |
| JGM       | 4-5* | E 103.488686° | N 30.755113° | 857.3         | 1251.5                    | 13.39            | 0.60                            | 90.90                 | forest areas       |
|           | 5-1  | E 103.405123° | N 30.770749° |               |                           |                  |                                 |                       |                    |
|           | 5-2  | E 103.400788° | N 30.776981° |               |                           |                  |                                 |                       |                    |
|           | 5-3* | E 103.393450° | N 30.794272° |               |                           |                  |                                 |                       |                    |

**Note:** Numbers with “\*” indicate the site installed with deposition collection devices. QQ, Qiquan; CY, Chongyang; YT, Yuantong; HY, Huaiyuan; JGM, Jiguan Mountain.
